# 1 **Mechanical and thermodynamic properties of $A\beta_{42}$ , $A\beta_{40}$ , and $\alpha$ -** 2 **synuclein fibrils: A coarse-grained method to complement experimen-** 3 **tal studies**

4 Adolfo B. Poma\*<sup>1</sup>, Horacio V. Guzman\*<sup>2</sup>, Mai Suan Li\*<sup>3</sup> and Panagiotis E. Theodorakis\*<sup>3</sup>

5 Address: <sup>1</sup>Institute of Fundamental Technological Research, Polish Academy of Sciences, Paw-  
6 ińskiego 5B, 02-106 Warsaw, Poland; <sup>2</sup>Max Planck Institute for Polymer Research, Ackermannweg  
7 10, 55128 Mainz, Germany and <sup>3</sup>Institute of Physics, Polish Academy of Sciences, Al. Lotników  
8 32/46, 02-668 Warsaw, Poland

9 Email: Adolfo B. Poma - poma@ippt.pan.pl; Horacio V. Guzman - vargas@mpip-mainz.mpg.de;  
10 Mai Suan Li - masli@ifpan.edu.pl; Panagiotis E. Theodorakis - panos@ifpan.edu.pl

11 \* Corresponding author

## 12 **Abstract**

13 We perform molecular dynamics simulation on several relevant biological fibrils associated with  
14 neurodegenerative diseases such as  $A\beta_{40}$ ,  $A\beta_{42}$ , and  $\alpha$ -synuclein systems to obtain a molecular un-  
15 derstanding and interpretation of nanomechanical characterization experiments. The computational  
16 method is versatile and addresses a new subarea within the mechanical characterization of hetero-  
17 geneous soft materials. We investigate both the elastic and thermodynamic properties of the biolog-  
18 ical fibrils in order to substantiate experimental nanomechanical characterization techniques that  
19 are quickly developing and reaching dynamic imaging with video rate capabilities. The computa-  
20 tional method qualitatively reproduces results of experiments with biological fibrils, validating its  
21 use in extrapolation to macroscopic material properties. Our computational techniques can be used  
22 for the co-design of new experiments aiming to unveil nanomechanical properties of biological fib-  
23 rils from a molecular understanding point of view. Our approach allows a comparison of diverse  
24 elastic properties based on different deformation, *i.e.* tensile ( $Y_L$ ), shear ( $S$ ), and indentation ( $Y_T$ ).  
25 From our analysis, we find a significant elastic anisotropy between axial and transverse directions  
26 (*i.e.*  $Y_T > Y_L$ ) for all systems. Interestingly, our results indicate a higher mechanostability in the  
27 case of  $A\beta_{42}$  fibrils than in the case of  $A\beta_{40}$ , suggesting a significant correlation between mechan-  
28 ical stability and aggregation propensity (rate) in amyloid systems, that is, the higher the mechan-  
29 ical stability the faster the fibril formation. Finally, we find that  $\alpha$ -synuclein fibrils are thermally  
30 less stable than  $\beta$ -amyloid fibrils. We anticipate that our molecular-level analysis of the mechan-

31 ical response under different deformation conditions for the range of fibrils considered here will  
32 provide significant insights for the experimental observations.

33 **Background:** Nanomechanical characterization of a single biological fibril is generally a challenge  
34 due to the typical thermal motion. Here, we propose a computational protocol that can assist ex-  
35 periment in elucidating the molecular background of the mechanical response in fibrils related to  
36 neurodegenerative diseases.

37 **Results:** We performed a systematic comparison of mechanical properties of different biological  
38 fibrils involved in neurodegenerative diseases. Our results show a higher mechanocanostability in  
39 case of  $A\beta_{42}$  fibrils than in the case of  $A\beta_{40}$ . This effect is observed for all different types of me-  
40 chanical deformation. Moreover, the  $\alpha$ -synuclein fibril shows a large anisotropy (i.e.  $Y_T > Y_L$ ) in  
41 comparison with  $\beta$ -amyloid fibrils, and it is thermally less stable than  $\beta$ -amyloid fibrils.

## 42 **Keywords**

43 Atomic Force Microscopy,  $\beta$ -amyloid;  $\alpha$ -synuclein; mechanical deformation; molecular simula-  
44 tion; proteins

## 45 **Introduction**

46 All-atom molecular dynamics (MD) simulation has been employed to study the physical and chem-  
47 ical behaviour of the fundamental biomolecules of life (*e.g.* proteins [1], nucleic acids [2] and  
48 lipids [3]). To this end, lipid membranes, viral capsids, and biological fibrils are common exam-  
49 ples of large complexes that pose significant challenges for all-atom simulation. For example, the  
50 time scales of various biological processes are in the range of  $10^{-6} - 10^{-3}$  s, and thus they are or-  
51 ders of magnitude larger than typical molecular motion (i.e.  $10^{-15} - 10^{-12}$  s) captured in all-atom  
52 MD. The length scales are similarly much smaller in all-atom simulation than it would be relevant  
53 for studying processes involving large conformation changes in large biological complexes. In the  
54 context of mechanical properties of various fibrils, for example,  $\beta$ -amyloids [4,5], cellulose [6] and  
55 collagen [7], all-atom models have been used to estimate the elastic moduli based on the response  
56 of the system, but mostly approximately. Still, molecular-level methods are necessary to under-  
57 stand the microscopic mechanisms of the mechanical response of biological fibrils. In this regard,  
58 coarse-grained (CG) models are suitable, because they remove several degrees of freedom of the  
59 system, which enables them to reach the experimental time and length scales that describe the rel-  
60 evant phenomena while maintaining a molecular-level description of the systems under considera-  
61 tion [8-11]. In particular, CG simulation is able to describe large structural changes in the context  
62 of fibril deformation, which would be otherwise impossible with all-atom models. In particular,  
63 the CG model can be used to infer the elastic parameter in ideal conditions, which is given by the

64 Hertz model [12] and is valid for isotropic materials and as close as possible to the experimental  
65 conditions [13]. While other sophisticated ‘Hertz models’ [14,15] aim to study the elastic proper-  
66 ties of anisotropic materials with high symmetries, *e.g.* crystals, softer materials such as biological  
67 fibrils or polymers are not suitable for such descriptions. Although biological matter is an exam-  
68 ple of an anisotropic material, it is not expected to follow *a priori* a simple Hertzian relationship  
69 given by  $F \approx Y_T h^{3/2}$  (with  $Y_T$  the transversal Young modulus and  $h$  the indentation depth). When it  
70 actually follows this relationship, the elastic modulus can be easily obtained from the slope of the  
71 curve. This approach can be used to test the experimental estimation of an elastic property. Most  
72 importantly, the mechanism of deformation that give rise to the linear response can be character-  
73 ized in the CG simulation. From the experimental point of view, there is a long-standing discus-  
74 sion in the Atomic Force Microscopy (AFM) community whether Hertzian mechanics is applica-  
75 ble to all explored soft matter samples with AFM. One of the basic assumptions of Hertz model  
76 is that the indented object is a half-space and made out of a homogeneous material. However, at  
77 the nanoscale it is intrinsically difficult to measure pure and homogeneous materials, or perfectly  
78 mixed materials, with some exceptional cases, such as the Highly Oriented Pyrolytic Graphite  
79 (HOPG), Silica, and other ‘clean’ surfaces, which are, however, very far away from biological sys-  
80 tems. Moreover, by considering the indenter as a sphere, the anisotropies in the deformed material  
81 can be screened, since the measured deformation depends on the contact area, which will be the arc  
82 region that forms in contact with the sphere. In considering other shapes for the cantilever tip, such  
83 as conical or flat punch, the impact of the anisotropy is expected to be much higher [16]. Nonethe-  
84 less, to our knowledge the exact shape of the cantilever tip cannot be determined during experi-  
85 mental measurements. As a result, big discrepancies are found when comparing Young moduli  
86 measured with macroscopic techniques and nanoscopic ones such as AFM, because a nanoscopic  
87 exploration of biological systems reaches molecular resolutions and the measurements are in gen-  
88 eral very delicate due to the intrinsic properties of soft matter and the danger of damaging the sam-  
89 ples [17]. As a matter of fact, the employed reference model to study the mechanical response of  
90 the biological fibrils during AFM nanoindentation has been also the Hertz model. Hence we also  
91 use it as a reference for comparing the indentational values we obtained to the experimental ones,  
92 although we remark that our molecular modeling can adapt further anisotropic mechanical models,  
93 envisioned within force microscopy techniques.

94 Biological fibrils are well known biomaterials of practical use. The related technological applica-  
95 tions range from drug delivery [18] to structural scaffolds [19], where the role of the fibril may be  
96 to immobilize small molecules (*e.g.* enzymes [20]). The applications are motivated by their unique  
97 properties, such as the spontaneous formation under certain conditions, the high mechanical stabil-  
98 ity (comparable to silk), and the ability of forming ordered structures, albeit the monomeric units

99 (proteins) of these fibrils are intrinsically disordered. [21,22] These are fundamental properties for  
100 applications that require that fragmentation of the material be avoided, for example, during synthe-  
101 sis, active process (drug delivery) or response to an external perturbation (*e.g.* change in tempera-  
102 ture). To this end, the interplay between mechanical and thermodynamic properties will determine  
103 the overall behaviour of the fibrils, which depends on the arrangement of the individual amino acid  
104 chains in these structures. The case of fibrils consisting of either 40-mer or 42-mer amyloid chains  
105 (it contains two additional hydrophobic amino acids) is particularly interesting. For example,  $A\beta_{40}$   
106 typically assembles into two-fold and three-fold symmetries (see Fig. 1), while the highest symme-  
107 try reported by experiments for  $A\beta_{42}$  fibrils is a two-fold symmetry, as in the case of  $\alpha$ -synuclein  
108 ( $\alpha$ -syn) fibrils. [23,24] Furthermore, the aggregation typically takes place 2.5 times faster in a so-  
109 lution of  $A\beta_{42}$  than in the case of  $A\beta_{40}$  [25,26]. Interestingly, the aggregation rate of fibril forma-  
110 tion has been found to be highly correlated with the mechanical properties of the fibrils, namely,  
111 the mechanically more stable fibril is the one with faster aggregation [27]. While experimental ob-  
112 servations have been derived from a small set of samples, our CG simulations can be used to vali-  
113 date these observations and study a larger set of fibrils.

114 Typical length scales of biological fibrils are in the range between nm and  $\mu\text{m}$ , therefore, AFM,  
115 which can operate, for example, in static (contact) and dynamic modes, has been one of the main  
116 methods to study such systems [28,29]. On the one hand, AFM in contact-mode has been used  
117 to provoke the mechanical deformation of fibrils, in this way obtaining the Young modulus (here  
118 denoted as  $Y_T$ ) [30-32]. On the other hand, the experimental determination of the tensile Young's  
119 modulus ( $Y_L$ ) is nontrivial at the nanoscale [33], due to the requirement of a different experimental  
120 setup, namely, the more involved sonification method [34]. Moreover, the experimental calculation  
121 of the shear modulus ( $S$ ) can be realised by suspending the fibril between two beams and pressing  
122 the free part against the indenter, which gives rise to the fibril bending modulus ( $Y_b$ ) that depends  
123 on both the  $Y_T$  and the  $S$ .

124 In this respect, our CG strategy can be used to extract and compare elastic properties in a system-  
125 atic way. This significant advantage of CG simulation has motivated the current study, which em-  
126 ploys MD simulation of a structure-based CG model [35-38] to investigate one  $\alpha$ -synuclein and  
127 five  $\beta$ -amyloid fibrils of known experimental structure related to specific neurodegenerative dis-  
128 eases. Our simulation sheds light on the mechanical and thermodynamic properties of these fibrils  
129 by providing the microscopic picture required to explain the relevant phenomena. We achieve this  
130 by applying different types of deformation (*e.g.* tension, shearing, indentation) and analysing the  
131 intermolecular contacts between amino acids. Our simulations reveal significant differences in the  
132 mechanical behaviour between 40 and 42  $\beta$ -amyloid, and  $\alpha$ -syn fibrils. Moreover, we find that the  
133  $\alpha$ -syn fibril is thermally less stable than the  $\beta$ -amyloid fibrils.

134 In the next section, we present details about our methodology. Then, we present our results and  
135 analysis, and in the last section we summarise our conclusions.

## 136 **Materials and Methods**

137 To realise our studies, we have chosen three different  $A\beta_{40}$  fibrils with PDB ids: 2LMO[39],  
138 2M4J[40] and 2MVX[41] and two  $A\beta_{42}$  with PDB ids: 5OQV[42], and 2NAO[43]. The only avail-  
139 able structure for  $\alpha$ -syn is the one with PDB id: 2N0A[44].

### 140 **The coarse-grained model**

141 In our CG model, each amino acid is represented by a bead located at the  $C_\alpha$ -atom position. The  
142 potential energy between beads reads:

$$\begin{aligned} 143 \quad V^{\text{CG}} = & \sum_{\text{bonds}} K_r (r - r_0)^2 + \sum_{\text{angles}} K_\theta (\theta - \theta_0)^2 + \sum_{\text{dihedrals}} K_\phi (\phi - \phi_0)^2 + \\ 144 \quad & \sum_{i < j}^{\text{CON}} 4\epsilon_{ij} \left[ \left( \frac{\sigma_{ij}}{r_{ij}} \right)^{12} - \left( \frac{\sigma_{ij}}{r_{ij}} \right)^6 \right] + \\ 145 \quad & \sum_{i < j}^{\text{NO-CON}} 4\epsilon' \left( \frac{r_{\text{cut}}}{r_{ij}} \right)^{12}. \end{aligned} \quad (1)$$

146 The first three terms on the right hand side of Eq.(1) correspond to the harmonic pseudo-bond,  
147 bond angle and dihedral potentials. The values of the elastic constants is,  $K_r = 100 \text{ kcal/mol/\AA}^2$ ,  
148  $K_\theta = 45 \text{ kcal/mol/rad}^2$  and  $K_\phi = 5.0 \text{ kcal/mol/rad}^2$ , which were derived from all-atom  
149 simulation[45]. The choice of equilibrium values  $r_0$ ,  $\theta_0$ , and  $\phi_0$  are based on two, three, and four  
150  $\alpha$ -C atoms, respectively, and are meant to favour the native geometry. The fourth term on the  
151 right-hand side of Eq.(1) takes into account the non-bonded contact interactions, described by the  
152 Lennard–Jones (LJ) potential. Here, we take  $\epsilon_{ij}$  to be uniform and equal to  $\epsilon = 1.5 \text{ kcal/mol}$ , which  
153 is also derived by all-atom simulation [45]. Our approach has shown very good agreement with  
154 experimental data on stretching [46,47] and nanoindentation of biological fibrils, such as virus cap-  
155 sids [35] and  $\beta$ -amyloids [36]. The strength of the repulsive non-native term,  $\epsilon'$ , is set equal to  $\epsilon$ .  
156 Our CG model takes into account native distances as in the case of a G $\delta$ -like model[37]. Hence,  
157 the native contacts are determined by the overlap criterion [48]. In practice, each heavy atom is as-  
158 signed to a van der Waals radius, as proposed by Tsai *et al.* [49]. A sphere with the radius enlarged  
159 by a factor of 1.24 is built around the atom. If two amino acids have heavy atoms with overlapping  
160 spheres, then we consider a native contact between those two  $C_\alpha$  atoms. In Fig. 2, we show the CG

161 representation for some biological fibrils, as well as, their native interactions. These native contacts  
162 represent hydrogen bonds (HB), and hydrophobic and ionic bridges interactions. Moreover, we  
163 consider contacts between amino acids in individual chains with sequential distance  $|i - j| > 4$ . The  
164 parameters  $\sigma_{ij}$  are given by  $r_{ij0}/2^{1/6}$ , where  $r_{ij0}$  is the distance between two  $C_\alpha$  atoms that form the  
165 native contact. The last term in Eq.(1) simply describes the repulsion between non-native contacts.  
166 Here, we take  $r_{\text{cut}} = 4 \text{ \AA}$ . Moreover, our terminology for the ‘contacts’ in this manuscript, is as fol-  
167 lows: i) intrachain contacts are considered those within a single chain, ii) interchain contacts are  
168 between two chains in a side-by-side configuration and iii) the intersheet contacts are found along  
169 the symmetry axis (see Fig. 2). Below, we provide details on the different types of mechanical de-  
170 formation, *i.e.* tensile, shear, and indentation processes.

## 171 **Mechanical and thermodynamics characterization through a CG model**

172 In our previous work [36], we have constructed a computational protocol for performing several  
173 types of mechanical deformation *in silico* (see Fig. 3). Such processes can be carried out at con-  
174 stant speed or force contact-modes. Here, we explore the former as it provides a dynamic picture  
175 of the whole process and it enables the characterisation of the mechanics during the early deforma-  
176 tion stages. Moreover, we employ the CG simulation for the validation of the elastic theory. This is  
177 done by calculating the coefficient “ $n$ ” in the force *versus*  $h^n$  indentation curves. In particular, we  
178 found  $n = 3/2$  in the linear regime, which corresponds to the Hertzian theory [12].

### 179 **Tensile deformation**

180 The experimental calculation of the stress–strain data in the nanoscale can be done by optical twee-  
181 zers (OT) [50], AFM base-force spectroscopy [51], or by the design of a sophisticated microelec-  
182 tromechanical systems (MEMS) [52]. These techniques have been successfully used to predict  
183 elastic properties of several biomolecules. However, OT are limited to applied loads below 0.1 nN  
184 and AFM has delicate calibration issues associated with a systematic deformation of samples with  
185 same length. In practice, all-atom simulation does not suffer from any of those drawbacks, but it  
186 can not be used in biological systems. Instead, CG models are more suitable to achieve the experi-  
187 mental length and time scales.

188 In practice, we set harmonic potentials to the furthest bottom and top particles of the protein.  
189 Then, we take values for the elastic constants equal to  $k_{\text{bottom}} = 100 \text{ kcal/mol/\AA}$  and  $k_{\text{top}} = 0.1$   
190  $\text{kcal/mol/\AA}$  for the top part of the fibril. The top part is moving with pulling speed equal to  $v_{\text{pull}} =$   
191  $5 \times 10^{-5} \text{ \AA/ns}$ . As a result of tensile deformation, the fibril stretches from a reference length ( $L_0$ ) to  
192  $L$ , and the strain is given by  $\phi = (L - L_0)/L_0$ . The stress is defined by the total force acting on the  
193 springs  $k_{\text{top}}$  divided by the cross-sectional area,  $A$ , of the sample. This area is calculated as follows



194 [53]: for a given set of Cartesian points, it determines the smallest convex polygon containing all  
195 the given points. Then, we monitor the elementary area of such polygon during the simulation.[54]  
196 From the stress–strain plot one can derive the corresponding tensile Young modulus,  $Y_L$ .

### 197 **Shear deformation**

198 The experimental techniques employed before for determination of the  $Y_L$  are not transferable for  
199 the calculation of the shear modulus ( $S$ ) at the nanoscale. In this respect, an improved version of  
200 the single three-point bending technique was developed for the calculation of  $S$  [55]. It combines  
201 a movement along the  $z$ -axis (perpendicular to the main fibril axis) with a continuous scanning  
202 motion along the main fibril axis. In this way, the slope  $dF/dz$  enables a better calculation of the  
203 bending modulus ( $Y_b$ ) and as a result a more accurate value of  $S$ . In comparison to its predeces-  
204 sor, this technique reduces the error in the value of  $S$  up to 12% in the case of collagen fibrils [55],  
205 but it still relies on the correct estimation of fibril diameter. As above, here CG model helps to de-  
206 vise a protocol where simple shear planes can be applied on a set of atoms and typical response  
207 allows in a straightforward manner the calculation of  $S$ . In this case, we only couple the  $C_\alpha$ -atom  
208 from the top ( $k_{\text{top}}$ ) and the bottom ( $k_{\text{bottom}}$ ) planes. The strain is defined by  $\phi = x/y$ , where  $x$  is the  
209 displacement of the top plane and  $y$  is the height of the fibril (see Fig. 3). The shear-stress is calcu-  
210 lated as the total force acting on the top plane divided by the area of the plane (see in Table 1 the  
211 reference  $C_\alpha$ -atom used to define the top plane). From the stress–strain relation one can derive the  
212 corresponding shear Young modulus,  $S$ .

### 213 **Indentation deformation**

214 One of the empirical techniques used to estimate  $Y_T$  modulus is AFM nanoindentation. The wide  
215 range of applications of AFM technique span from biomolecules to single cells [31,56,57]. The  
216 AFM nanoindentation force–distance curves typically depend on the correct determination of the  
217 cantilever stiffness and measurements of biological fibrils located at the center of the fibril are only  
218 considered. The former refers to the way that the indentation load is measured by the deflection  
219 of the AFM cantilever. The latter is an assumption of the seminfinity half-space approximation.  
220 Once the AFM data is obtained, it requires the interpretation by a contact theory. There is not any  
221 experiment at the nanoscale where the influence of the indenter could be neglected. Depending on  
222 the type of forces between the indenter and the biomaterial, we might describe the process by non-  
223 adhesive [12] or adhesive contact theories [58,59]. Here, we suggest our particle-based CG method  
224 as a tool to idealize the nanoindentation process. **It is worth noting that we prevent any possible**  
225 **adhesion between the indenter and the fibril by placing a divergent interaction between the tip and**  
226 **the  $C_\alpha$  atom, and hence other models [58,60] with such features are not considered.** moreover we

227 chose the Young modulus of the indenter equal to  $\infty$ . Moreover, we define each system in the limit  
228 of the Hertzian theory [12]. The indenter is a sphere with a radius of curvature  $R_{\text{ind}}$  that moves to-  
229 wards the fibril with a speed  $v_{\text{ind}}$ . Then, the penetration or indentation depth ( $h$ ) is measured from  
230 the first tip–particle interaction (or contact) and the associated indentation force ( $F$ ) is calculated  
231 until the indenter stops being in contact with the fibril. From Hertz’s relation,  $F = \frac{4 R_{\text{ind}}^{1/2} Y_T}{3(1-\nu^2)} \times h^{3/2}$ ,  
232 where  $\nu$  is the Poisson coefficient, in this case equal to 0.5. This value corresponds to a homoge-  
233 neous deformation in the  $xy$  plane. From Hertz’s equation, we derive the transverse Young modu-  
234 lus,  $Y_T$ , in the linear regime of the  $F - h$  curve.

### 235 **Thermodynamic characterization**

236 The study of the thermal stability in the case of  $A\beta$  fibrils faces serious difficulties, stemming from  
237 the requirement for controlled *in vitro* preparation of samples with well-ordered  $A\beta_{40}$  or  $A\beta_{42}$  fib-  
238 rils. In this regard, our CG simulation is an ideal protocol as it enables the calculation of the melt-  
239 ing temperatures for well-ordered  $A\beta$  fibrils. To assess the thermal stability of the fibril, we com-  
240 pute the probability of finding the protein in the native state,  $P_0$ , as a function of the temperature  
241  $T$ . We define the temperature of thermodynamic stability,  $T_m$ , for the case  $P_0 = \frac{1}{2}$ . To study the  
242 thermodynamic properties of the biological fibrils, we carried out overdamped Langevin dynamics  
243 simulations. The simulations were performed for 35 different temperatures,  $T$ , which were uni-  
244 formly distributed in the interval  $0.1-0.7 \text{ } \epsilon/k_B$ . Each simulation was  $10^4 \tau$  long after running the  
245 systems for  $10^3 \tau$  in order to reach equilibrium. In our studies, the unit of time,  $\tau$ , is of the order of  
246 1 ns. For this range of temperatures and time scales, we did not observe any dissociation or unfold-  
247 ing events for the fibrils. The deviation of the fibril structure from its native state was computed by  
248 means of the root mean square deviation (RMSD), which is defined as follows:

$$249 \quad \text{RMSD}(t) = \frac{1}{N} \left[ \sum_{i=i}^N (\vec{r}_i(t) - \vec{r}_i^{\text{NAT}})^2 \right] \quad (2)$$

250 where  $\vec{r}_i^{\text{NAT}}$  denotes the positions of  $C_\alpha$ -atoms in the native state and  $\vec{r}_i$  are positions of the  $C_\alpha$ -  
251 atoms at time  $t$  after superimposing the native structure. After equilibration, RMSD fluctuates  
252 around an average value,  $\langle \text{RMSD} \rangle$ , which is a function of temperature  $T$ . In our case, the observed  
253 deviations from the native state in terms of RMSD are small.



## 254 **Results and Discussion**

### 255 **Tensile deformation**

256 Our results for tensile deformation for all studied cases are illustrated in Fig. 4. The initial length  
257 ( $L_0$ ) is measured after an equilibration of  $100 \tau$ . The cross-section area ( $A$ ) for each system is mon-  
258 itored during the simulation and is shown as a function of strain in the insets of Fig. 4. The devia-  
259 tions are small compared to the mean value, especially in the case of  $\beta$ -amyloid fibrils. Hence, we  
260 calculated the stress using the average value of  $A$ . The values of the cross-section areas and the ini-  
261 tial length for each fibril are listed in Table 1. The theoretical values of  $Y_L$  have been obtained for  
262  $v_{\text{pull}} = 0.0005 \text{ \AA}/\tau$  as listed in Table 2, next to the experimental values for the sake of comparison.  
263 In our studies, the deformation is carried out along the main axis of symmetry (see Fig. 1) for  $A\beta$   
264 and  $\alpha$ -syn fibrils. We find that the type of  $A\beta$  fibril plays a more important role in the mechanical  
265 properties than the symmetry of each fibril. This becomes apparent by comparing the values of the  
266 tensile Young moduli between  $A\beta_{40}$  and  $A\beta_{42}$ . Our discussion is based on the average values of  $Y_L$ .  
267 In the case of  $A\beta_{40}$ ,  $Y_L = 2.1 \text{ GPa}$ , while for  $A\beta_{42}$  this value is  $2.4 \text{ GPa}$ . The value  $Y_L = 2.3 \text{ GPa}$  in  
268 the case of  $\alpha$ -syn seems to be half way between the  $A\beta_{40}$  and  $A\beta_{42}$  fibrils. Moreover, our  $Y_L$  values  
269 are close to the experimental values of collagen fibril equal to  $1.9\text{-}3.4 \text{ GPa}$  [61]. The bottom panels  
270 in Fig. 4 illustrate the distributions of lengths for the ‘native contacts’ (intrachain, interchain, and  
271 intersheet) as defined in our CG model (Fig. 2). We observe that the intersheet contacts become  
272 stretched, an effect that is independent of the system in terms of symmetry or type of individual  
273 chains (40 or 42  $\beta$ -amyloid). In contrast, the interchain contacts, which keep together  $A\beta$  chains in  
274 the cross-section area, reduce their length. Moreover, in the case of  $\alpha$ -syn there are no interchain  
275 contacts given that there is only one chain at the cross-section. In this case, only the intrachain  
276 contacts stretch during tensile deformation. A similar mechanism is found in  $A\beta$  fibrils (data not  
277 shown), which is consistent with the expectation to maintain the cross-section area constant in the  
278 linear regime, used to calculate the Young modulus.

### 279 **Shearing deformation**

280 Our results for all systems are presented in Fig. 5. The shear deformation for  $A\beta$  and  $\alpha$ -syn fibrils  
281 takes place along the same directions as in the case of tensile deformation (see Fig. 3). The ini-  
282 tial values of the top-plane areas for each fibril are listed in Table 1. The insets in the left panels  
283 of Fig. 5 demonstrate that the area  $A$  does not change when shear is applied. The values of shear  
284 modulus ( $S$ ) computed for  $v_{\text{pull}} = 0.0005 \text{ \AA}/\tau$  are listed in Table 2. In our studies, these values  
285 show a large dependence on the type of  $A\beta$  fibril. We find that  $S$  for  $A\beta_{42}$  is about  $1.6 \text{ GPa}$ , while  
286 for  $A\beta_{40}$  it is equal to  $0.7 \text{ GPa}$ . The 2.3-fold increase supports the picture that the  $A\beta_{42}$  fibril is me-

Table 1: List of geometric parameters of the fibril structures used to determine the  $Y_L$ ,  $Y_T$ , and  $S$ . Bottom line shows the protein segment used to define the shear plane as illustrated in Fig. 3.

| $A\beta_{40}$                              | 2LMO              | 2MJ4                   | 2MVX              |
|--------------------------------------------|-------------------|------------------------|-------------------|
| Initial length, $L_0$ [nm]                 | $41.10 \pm 0.23$  | $42.21 \pm 0.34$       | $29.10 \pm 0.31$  |
| Cross-section area, $A$ [nm <sup>2</sup> ] | $16.02 \pm 0.20$  | $21.11 \pm 0.33$       | $19.20 \pm 0.41$  |
| Shear plane area, $A$ [nm <sup>2</sup> ]   | $160.01 \pm 0.11$ | $170.20 \pm 0.41$      | $131.00 \pm 0.41$ |
| residue-id involved in shear plane         | Gln15–Asp23       | Asp1–Ala23, Asp1'      | Gly9–Gly24        |
| $A\beta_{42}$                              | 5OQV              | 2NAO                   |                   |
| Initial length, $L_0$ [nm]                 | $29.30 \pm 0.23$  | $29.10 \pm 0.31$       |                   |
| Cross-section area, $A$ [nm <sup>2</sup> ] | $17.30 \pm 0.11$  | $14.20 \pm 0.34$       |                   |
| Shear plane area, $A$ [nm <sup>2</sup> ]   | $123.00 \pm 0.10$ | $140.10 \pm 0.11$      |                   |
| residue-id involved in shear plane         | Tyr10–Asp23       | Asp1–Asp7, Glu22–Gly25 |                   |
| $\alpha$ -syn                              | 2N0A              |                        |                   |
| Initial length, $L_0$ [nm]                 | $45.20 \pm 0.31$  |                        |                   |
| Cross-section area, $A$ [nm <sup>2</sup> ] | $11.30 \pm 0.41$  |                        |                   |
| Shear plane area, $A$ [nm <sup>2</sup> ]   | $160.00 \pm 0.24$ |                        |                   |
| residue-id involved in shear plane         | Lys45–Glu105      |                        |                   |

287 mechanically more stable than the  $A\beta_{40}$  [27]. The  $S$  value for  $\alpha$ -synuclein is comparable to the  $A\beta_{40}$ .  
 288 No experimental data on  $S$  for  $\alpha$ -synuclein fibril has been reported, but it is expected to comprise  
 289 the range between 1.4-300 MPa. Both limits are typical of microtubules [63] and collagen [55] sys-  
 290 tems, which are assemblies of proteins. Main discrepancies between our computational studies and  
 291 experimental results are expected. One of the sources of divergence is associated with the crystal-  
 292 like regions, which are present in the biological fibrils during each deformation *in silico*. The ini-  
 293 tial structure of fibrils are very close to the minimum free energy state (native). Here, the number  
 294 of hydrogen bonds that participate in the deformation as a whole is larger as reported by all-atom  
 295 [4,5]. In contrast, during *in vitro* self-assembly of neurodegenerative fibrils the fibrilization process  
 296 is dominated by extended regions of amorphous aggregates. Such regions will induce the overall  
 297 softening of the fibril and therefore the drop in the elastic modulus.

298 The bottom panels in Fig. 5 show the distributions of the characteristic native distances (see Fig. 2  
 299 for their definition). For  $\beta$ -amyloid and  $\alpha$ -synuclein fibrils, the intersheet contacts become slightly  
 300 stretched, but the distances in the interchain contacts within each sheet are not affected in the case  
 301 of amyloids. The same analogy can be seen for the intrachain contacts in  $\alpha$ -synuclein. This effect  
 302 helps the system to keep constant the thickness of the fibril, a condition for the calculation of shear  
 303 modulus in the linear regime.

### 304 Indentation deformation

305 Our results for all systems are presented in Fig. 6. The indentational deformation for  $A\beta$  and  $\alpha$ -syn  
 306 fibrils takes place in the normal direction the plane,  $z = 0$  and at the position  $L = 1/2L_0$  (see Fig. 3).

Table 2: The elastic moduli for the  $A\beta_{40}$ ,  $A\beta_{42}$  and  $\alpha$ -syn from experiment and our CG model. in this paper. The structural symmetry of  $\beta$ -amyloid (if specified in the literature) is given next to the PDB entries. The experimental results regarding indentation for  $A\beta_{42}$  and  $\alpha$ -syn have been taken from Ref. [30]. The experimental values for the shear modulus ( $S$ ) for  $\beta$ -amyloids have been taken from Ref. [62], whereas the experimental value of  $S$  and  $Y_L$  for  $\alpha$ -syn are currently unknown.

| Tensile ( $Y_L$ )/PDB id     | Symmetry | $A\beta_{40}$  | $A\beta_{42}$  | $\alpha$ -syn  |
|------------------------------|----------|----------------|----------------|----------------|
| 2LMO                         | 2-fold   | $1.6 \pm 0.1$  |                |                |
| 2MJ4                         | 3-fold   | $3.1 \pm 0.1$  |                |                |
| 2MVX                         | 2-fold   | $1.5 \pm 0.1$  |                |                |
| 5OQV                         | 2-fold   |                | $2.0 \pm 0.2$  |                |
| 2NAO                         | 2-fold   |                | $2.7 \pm 0.2$  |                |
| 2N0A                         | –        |                |                | $2.3 \pm 0.2$  |
| Exp                          | –        | --             | --             | --             |
| Shear ( $S$ )/PDB id         |          |                |                |                |
| 2LMO                         | 2-fold   | $0.6 \pm 0.3$  |                |                |
| 2MJ4                         | 3-fold   | $1.2 \pm 0.2$  |                |                |
| 2MVX                         | 2-fold   | $0.4 \pm 0.1$  |                |                |
| 5OQV                         | 2-fold   |                | $1.3 \pm 0.2$  |                |
| 2NAO                         | 2-fold   |                | $1.8 \pm 0.1$  |                |
| 2N0A                         | –        |                |                | $0.7 \pm 0.2$  |
| Exp                          | –        | $0.1 \pm 0.02$ | --             | --             |
| Indentation ( $Y_T$ )/PDB id |          |                |                |                |
| 2LMO                         | 2-fold   | $3.0 \pm 0.1$  |                |                |
| 2MJ4                         | 3-fold   | $6.0 \pm 0.2$  |                |                |
| 2MVX                         | 2-fold   | $5.0 \pm 0.1$  |                |                |
| 5OQV                         | 2-fold   |                | $7.0 \pm 0.3$  |                |
| 2NAO                         | 2-fold   |                | $16.0 \pm 0.4$ |                |
| 2N0A                         | –        |                |                | $13.0 \pm 0.1$ |
| Exp                          | –        | --             | $3.2 \pm 0.8$  | $2.2 \pm 0.6$  |

307 The initial values of the fibril length for each fibril are listed in Table 1. The values of transversal  
308 Young modulus ( $Y_T$ ) computed for  $v_{\text{pull}} = 0.005 \text{ \AA}/\tau$  are listed in Table 2. In our studies, for the  
309 case of  $A\beta$  our results show a large dependence on the type of  $A\beta$  fibril. We determine that  $Y_T$  for  
310  $A\beta_{42}$  is about 12 GPa, while for  $A\beta_{40}$  it is equal to 5 GPa. The 2.5-fold increase supports the pic-  
311 ture that the  $A\beta_{42}$  fibril is mechanically more stable than the  $A\beta_{40}$  [27]. Because  $A\beta_{42}$  aggregates  
312 faster than  $A\beta_{40}$  [64] our findings support the correlation between mechanical stability and aggre-  
313 gation propensity as in ref. [27]. The  $Y_T$  value for  $\alpha$ -synuclein is comparable to the  $A\beta_{42}$ . The ex-  
314 perimental data on  $Y_T$  for  $\alpha$ -syn fibril has been reported [30] and it is a factor 2 smaller than  $A\beta_{40}$ .  
315 Such difference is attributed uncontrollable growth of amorphous aggregates during fibrillization  
316 that makes softer the fibril. But it is worth mentioning that our theoretical values can be considered

317 as an upper bound and it derived such parameter in the case of highly ordered fibrils. Moreover, the  
318 same result has been observed in all-atom simulations studies [5].

319 The bottom panels in Fig. 6 show the distributions of the characteristic native distances (see Fig.  
320 2 for their definition). For  $A\beta$  and  $\alpha$ -syn fibrils, the intersheet contacts become stretched, but the  
321 distances in the interchain contacts within each sheet are shortened in the case of amyloids. The  
322 same analogy can be seen for the intrachain contacts in  $\alpha$ -synuclein.

## 323 **Thermodynamic characterization of fibrils**

324 Our results regarding the effect of the temperature for each fibril structure are presented in Fig. 7.  
325 We first study the  $P_0$  for all fibrils as a function of the temperature. Fig. 7 (top panel) shows that  
326 the probability  $P_0$  of finding the fibrils in the native state is larger for the  $A\beta_{40}$  and  $A\beta_{42}$  when com-  
327 pared to  $\alpha$ -syn at any given temperature. This result is in agreement with a differential calorimetry  
328 experiment where it is observed that  $T_m$  for  $\beta$ -amyloid fibrils is larger than  $\alpha$ -syn fibrils [65,66]. In  
329 terms of the single fibril the  $A\beta_{40}$  (PDB id: 2MVX) with two-fold symmetry is the most stable at  
330 higher temperature (thermophilic character) among the other two-fold and three-fold  $\beta$ -amyloids.  
331 The calibration of our room temperature is  $0.35 \epsilon/k_B$ . In particular, the folding temperature ( $T_f$ )  
332 defined in our CG model at  $P_0$  equal to 0.5 gives  $T_f$  equal to 0.38, 0.42, 0.44, 0.46, and 0.48 in units  
333 of  $\epsilon/k_B$  for the amyloids with PDB entry 2LMO, 2MJ4, 2NAO, 5OQV, and 2MVX, respectively.  
334 With our calibration of  $\epsilon$ , the difference between the most (PDB id: 2MVX) and less (PDB id:  
335 2LMO) thermophilic fibrils is of the order of  $85^\circ\text{C}$ . Our results indicate that the  $\alpha$ -syn fibril is  
336 less thermally stable in comparison with the  $A\beta$  system and this behaviour seems to be intrinsi-  
337 cally associated with the extended disordered N-terminus and C-terminus domains. In our model,  
338 for  $\alpha$ -syn we have determined that  $T_f$  is  $0.33 \epsilon/k_B$ . The difference in temperature with respect to  
339  $A\beta$  with PDB ids 2LMO and 2MVX is  $43^\circ\text{C}$  and  $128^\circ\text{C}$ , respectively. This implies a higher ther-  
340 modynamic stability of the  $A\beta$  systems in comparison with  $\alpha$ -syn, which may explain the easier  
341 formation of  $A\beta$  fibrils over  $\alpha$ -syn. Fig. 7 (right side) shows that  $\langle\text{RMSD}\rangle$  is larger in the case of  
342  $\alpha$ -syn than in the case of  $A\beta$  fibrils, at any given  $T$ . In addition, Fig. 7 (bottom panel) presents the  
343 RMSF results for all fibrils. We observe that the disordered domains (N- and C-terminus) in  $\alpha$ -syn  
344 are very flexible in comparison with  $A\beta$  fibrils.

## 345 **Conclusion**

346 We have carried out molecular dynamics simulations to study the elastic properties of two fami-  
347 lies of biological fibrils, namely, the  $\beta$ -amyloid and  $\alpha$ -syn. The elastic properties of this study are  
348 the tensile, shear, and indentation deformations. Overall, our results are in agreement with the cor-

349 responding experimental values that could be obtained from the literature. Moreover, our method  
350 is sensitive to variations in the chain length and the symmetry of the  $\beta$ -amyloid fibril. Our results  
351 indicate a higher mechanostability in the case of  $\beta A_{42}$  fibrils than in the case of  $\beta A_{40}$ , namely,  
352  $Y_L^{A\beta_{42}}/Y_L^{A\beta_{40}} = 1.14$ ,  $S^{A\beta_{42}}/S^{A\beta_{40}} = 2.30$ , and  $Y_T^{A\beta_{42}}/Y_T^{A\beta_{40}} = 2.34$ . This result is consistent with the  
353 results obtained by means of the rupture force [27]. Most importantly, given that the aggregation  
354 rate depends on the mechanical stability of the fibrils [27] our study could provide also hints for  
355 self-assembly  $\beta$ -amyloid and  $\alpha$ -syn chains. Our results also indicate an elastic anisotropy namely,  
356  $Y_T > Y_L$ , for all systems. In the case of  $\alpha$ -syn fibrils such anisotropy, which is expressed by the  
357 difference between  $Y_T$  and  $Y_L$ , which is almost one order of magnitude. In contrast, in the case of  
358  $\beta$ -amyloid fibrils the anisotropy is considerably smaller.  
359 We find that this effect is due to the deformation of the hydrophobic core (segments 61–95).  
360 We have also confirmed that the large anisotropy in the case of  $\alpha$ -syn neither depends on the N-  
361 terminus nor the C-terminus domains. Although the the mechanical properties indicate some sim-  
362 ilar behaviour between  $\alpha$ -syn and  $\beta$ -amyloid fibrils, thermodynamic properties reveal a different  
363 behaviour, that is  $\beta$ -amyloid fibrils are thermally more stable than  $\alpha$ -syn fibrils. Hence,  $\beta$ -amyloid  
364 fibrils are in general more stable at higher temperatures than at room temperature, for example,  
365 whereas the opposite effect takes place in the case of  $\alpha$ -syn fibrils. In this regard, our method can  
366 be used to explore systematically the temperature dependence of the mechanical properties (ther-  
367 moelastic) in biological fibrils at experimental length and time scales.

## 368 Acknowledgements

369 We thank Claudio Perego for critically reading the manuscript. This research has been sup-  
370 ported by the National Science Centre, Poland, under grant No. 2015/19/P/ST3/03541,  
371 2015/19/B/ST4/02721, and No. 2017/26/D/NZ1/00466. This project has received funding from the  
372 European Union’s Horizon 2020 research and innovation programme under the Marie Skłodowska-  
373 Curie grant agreement No. 665778. This research was supported in part by PLGrid Infrastructure.

## 374 References

- 375 1. MacKerell Jr, A. D.; Bashford, D.; Bellott, M.; Dunbrack Jr, R. L.; Evanseck, J. D.;  
376 Field, M. J.; Fischer, S.; Gao, J.; Guo, H.; Ha, S. et al. *J. Phys. Chem. B* **1998**, *102* (18),  
377 3586–3616. doi:10.1021/jp973084f.
- 378 2. MacKerell Jr, A. D.; Banavali, N. K. *J. computat. Chem.* **2000**, *21* (2), 105–120. doi:10.1002/  
379 (SICI)1096-987X(20000130)21:2<105::AID-JCC3>3.0.CO;2-P.

- 380 3. Pastor, R.; MacKerell Jr, A. *J. Phys. Chem. Lett.* **2011**, *2* (13), 1526–1532. doi:10.1021/  
381 jz200167q.
- 382 4. Xu, Z.; Paparcone, R.; Buehler, M. J. *Biophys. J.* **2010**, *98* (10), 2053–2062. doi:10.1016/j.bpj.  
383 2009.12.4317.
- 384 5. Paparcone, R.; Buehler, M. J. *Biomaterials* **2011**, *32* (13), 3367–3374. doi:10.1016/j.  
385 biomaterials.2010.11.066.
- 386 6. Wu, X.; Moon, R. J.; Martini, A. *Cellulose* **2013**, *20* (1), 43–55. doi:10.1007/  
387 s10570-012-9823-0.
- 388 7. Gautieri, A.; Vesentini, S.; Redaelli, A.; Buehler, M. J. *Nano letters* **2011**, *11* (2), 757–766.  
389 doi:10.1021/nl103943u.
- 390 8. Schillers, H.; Rianna, C.; Schäpe, J.; Luque, T.; Doschke, H.; Wälte, M.; Uriarte, J. J.;  
391 Campillo, N.; Michanetzis, G. P.; Bobrowska, J. et al. *Sci. Rep.* **2017**, *7* (1), 5117. doi:10.  
392 1038/s41598-017-05383-0.
- 393 9. Sumbul, F.; Marchesi, A.; Takahashi, H.; Scheuring, S.; Rico, F. High-Speed Force Spec-  
394 troscopy for Single Protein Unfolding. In *Nanoscale Imaging*; Springer, 2018; pp 243–264.  
395 doi:10.1007/978-1-4939-8591-3.
- 396 10. Ezzeldin, H. M.; de Tullio, M. D.; Vanella, M.; Solares, S. D.; Balaras, E. *Ann. Biomed. Eng.*  
397 **2015**, *43* (6), 1398–1409. doi:10.1007/s10439-015-1273-z.
- 398 11. Darré, L.; Machado, M. R.; Brandner, A. F.; González, H. C.; Ferreira, S.; Pantano, S. *J.*  
399 *Chem. Theory Comput.* **2015**, *11* (2), 723–739. doi:10.1021/ct5007746.
- 400 12. Hertz, H. *J. Reine Angew. Math.* **1881**, *92*, 156–171. doi:10.1515/crll.1882.92.156.
- 401 13. Vinckier, A.; Semenza, G. *FEBS lett.* **1998**, *430* (1-2), 12–16. doi:10.1016/S0014-5793(98)  
402 00592-4.
- 403 14. Wills, M. R.; Savory, J. *Lancet* **1983**, No. 2, 29.
- 404 15. Vlassak, J. J.; Nix, W. *Philos. Mag. A* **1993**, *67* (5), 1045–1056. doi:10.1080/  
405 01418619308224756.
- 406 16. San Paulo, A.; Garcia, R. *Biophys. J.* **2000**, *78* (3), 1599–1605. doi:10.1016/S0006-3495(00)  
407 76712-9.



- 408 17. Perrino, A. P.; Garcia, R. *Nanoscale* **2016**, *8* (17), 9151–9158. doi:10.1039/C5NR07957H.
- 409 18. Pertinhez, T. A.; Conti, S.; Ferrari, E.; Magliani, W.; Spisni, A.; Polonelli, L. *Mol. Pharm.*  
410 **2009**, *6* (3), 1036–1039. doi:10.1021/mp900024z.
- 411 19. Ahn, M.; Kang, S.; Koo, H. J.; Lee, J.-H.; Lee, Y.-S.; Paik, S. R. *Biotechnol. Prog.* **2010**, *26*  
412 (6), 1759–1764. doi:10.1002/btpr.466.
- 413 20. Bhak, G.; Lee, S.; Park, J. W.; Cho, S.; Paik, S. R. *Biomaterials* **2010**, *31* (23), 5986–5995.  
414 doi:10.1016/j.biomaterials.2010.03.080.
- 415 21. Granata, D.; Baghal, F. B.; Camilloni, C.; Vendruscolo, M.; Laio, A. *Biophys. J.* **2013**, *104*  
416 (2), 55a. doi:10.1016/j.bpj.2012.11.344.
- 417 22. Ball, K. A.; Wemmer, D. E.; Head-Gordon, T. *J. Phys. Chem. B* **2014**, *118* (24), 6405–6416.  
418 doi:10.1021/jp410275y.
- 419 23. Emamzadeh, F. N. *J. Res. Med. Sci.* **2016**, *21*, 29. doi:10.4103/1735-1995.181989.
- 420 24. Bertoncini, C. W.; Jung, Y.-S.; Fernandez, C. O.; Hoyer, W.; Griesinger, C.; Jovin, T. M.;  
421 Zweckstetter, M. *Proc. Natl. Acad. Sci. USA* **2005**, *102* (5), 1430–1435. doi:10.1073/pnas.  
422 0407146102.
- 423 25. Tiiman, A.; Krishtal, J.; Palumaa, P.; Tõugu, V. *AIP Advances* **2015**, *5* (9), 092401. doi:10.  
424 1063/1.4921071.
- 425 26. Vandersteen, A.; Hubin, E.; Sarroukh, R.; De Baets, G.; Schymkowitz, J.; Rousseau, F.; Sub-  
426 ramaniam, V.; Raussens, V.; Wenschuh, H.; Wildemann, D. et al. *FEBS Lett.* **2012**, *586* (23),  
427 4088–4093. doi:10.1016/j.febslet.2012.10.022.
- 428 27. Kouza, M.; Co, N. T.; Li, M. S.; Kmiecik, S.; Kolinski, A.; Kloczkowski, A.; Buhimschi, I. A.  
429 *J. Chem. Phys.* **2018**, *148* (21), 215106. doi:10.1063/1.5028575.
- 430 28. Garcia, R.; Perez, R. *Surf. Sci. Rep.* **2002**, *47*, 197. doi:10.1016/S0167-5729(02)00077-8.
- 431 29. Guzman, H. V. *Beilstein J. Nanotechnol.* **2017**, *8*, 968–974. doi:10.3762/bjnano.8.98.
- 432 30. Ruggeri, F. S.; Adamcik, J.; Jeong, J. S.; Lashuel, H. A.; Mezzenga, R.; Dietler, G. *Angew.*  
433 *Chem.* **2015**, *54* (8), 2462–2466. doi:10.1002/anie.201409050.
- 434 31. Sweers, K.; Van Der Werf, K.; Bennink, M.; Subramaniam, V. *Nanoscale Res. Lett.* **2011**, *6*  
435 (1), 270. doi:10.1186/1556-276X-6-270.

- 436 32. Sweers, K. K.; Bennink, M. L.; Subramaniam, V. *J. Phys. Condens. Matter* **2012**, *24* (24),  
437 243101. doi:10.1088/0953-8984/24/24/243101.
- 438 33. Herruzo, E. T.; Perrino, A. P.; Garcia, R. *Nat. Commun.* **2014**, *5*, 3126. doi:10.1038/  
439 ncomms4126.
- 440 34. Peng, Z.; Parker, A. S.; Peralta, M. D.; Ravikumar, K. M.; Cox, D. L.; Toney, M. D. *Biophys.*  
441 *J.* **2017**, *113* (9), 1945–1955. doi:10.1016/j.bpj.2017.09.003.
- 442 35. Cieplak, M.; Robbins, M. O. *PloS one* **2013**, *8* (6), e63640. doi:10.1371/journal.pone.  
443 0063640.
- 444 36. Poma, A. B.; Chwastyk, M.; Cieplak, M. *Phys. Chem. Chem. Phys.* **2017**, *19* (41),  
445 28195–28206. doi:10.1039/C7CP05269C.
- 446 37. Poma, A. B.; Cieplak, M.; Theodorakis, P. E. *J. Chem. Theory Comput.* **2017**, *13* (3),  
447 1366–1374. doi:10.1021/acs.jctc.6b00986.
- 448 38. Poma, A.; Li, M. S.; Theodorakis, P. *Phys. Chem. Chem. Phys.* **2018**, *20*, 17020–17028.  
449 doi:10.1039/C8CP03086C.
- 450 39. Paravastu, A. K.; Leapman, R. D.; Yau, W.-M.; Tycko, R. *Proc. Natl. Acad. Sci. USA* **2008**,  
451 *105* (47), 18349–18354. doi:10.1073/pnas.0806270105.
- 452 40. Lu, J.-X.; Qiang, W.; Yau, W.-M.; Schwieters, C. D.; Meredith, S. C.; Tycko, R. *Cell* **2013**,  
453 *154* (6), 1257–1268. doi:10.1016/j.cell.2013.08.035.
- 454 41. Schütz, A. K.; Vagt, T.; Huber, M.; Ovchinnikova, O. Y.; Cadalbert, R.; Wall, J.; Güntert, P.;  
455 Böckmann, A.; Glockshuber, R.; Meier, B. H. *Angew. Chem.* **2015**, *54* (1), 331–335. doi:10.  
456 1002/anie.201408598.
- 457 42. Gremer, L.; Schölzel, D.; Schenk, C.; Reinartz, E.; Labahn, J.; Ravelli, R. B.; Tusche, M.;  
458 Lopez-Iglesias, C.; Hoyer, W.; Heise, H. et al. *Science* **2017**, *358* (6359), 116–119. doi:10.  
459 1126/science.aao2825.
- 460 43. Wälti, M. A.; Ravotti, F.; Arai, H.; Glabe, C. G.; Wall, J. S.; Böckmann, A.; Güntert, P.;  
461 Meier, B. H.; Riek, R. *Proc. Natl. Acad. Sci. USA* **2016**, *113* (34), E4976–E4984. doi:10.1073/  
462 pnas.1600749113.

- 463 44. Tuttle, M. D.; Comellas, G.; Nieuwkoop, A. J.; Covell, D. J.; Berthold, D. A.; Kloep-  
464 per, K. D.; Courtney, J. M.; Kim, J. K.; Barclay, A. M.; Kendall, A. et al. *Nat. Struct. Mol.*  
465 *Biol.* **2016**, *23* (5), 409. doi:10.1038/nsmb.3194.
- 466 45. Poma, A. B.; Chwastyk, M.; Cieplak, M. *J. Phys. Chem. B* **2015**, *119* (36), 12028–12041.  
467 doi:10.1021/acs.jpcc.5b06141.
- 468 46. Sułkowska, J. I.; Cieplak, M. *Biophys. J.* **2008**, *95* (7), 3174–3191. doi:10.1529/biophysj.107.  
469 127233.
- 470 47. Sikora, M.; Sułkowska, J. I.; Witkowski, B. S.; Cieplak, M. *Nucleic Acids Res.* **2010**, *39*  
471 (suppl\_1), D443–D450. doi:10.1093/nar/gkq851.
- 472 48. Wołek, K.; Gómez-Sicilia, À.; Cieplak, M. *J. Chem. Phys.* **2015**, *143* (24), 243105. doi:10.  
473 1063/1.4929599.
- 474 49. Tsai, J.; Taylor, R.; Chothia, C.; Gerstein, M. *J. Mol. Biol.* **1999**, *290* (1), 253–266. doi:10.  
475 1006/jmbi.1999.2829.
- 476 50. Kellermayer, M. S.; Smith, S. B.; Bustamante, C.; Granzier, H. L. *Biophys. J* **2001**, *80* (2),  
477 852–863. doi:10.1016/S0006-3495(01)76064-X.
- 478 51. Graham, J. S.; Vomund, A. N.; Phillips, C. L.; Grandbois, M. *Exp. Cell Res* **2004**, *299* (2),  
479 335–342. doi:10.1016/j.yexcr.2004.05.022.
- 480 52. Eppell, S.; Smith, B.; Kahn, H.; Ballarini, R. *J. Royal Soc. Interface* **2006**, *3* (6), 117–121.  
481 doi:10.1098/rsif.2005.0100.
- 482 53. Theodorakis, P.; Egorov, S.; Milchev, A. *J. Chem. Phys.* **2017**, *146*, 244705. doi:10.1063/1.  
483 4990436.
- 484 54. García-García, J.; Marín-Aragón, D.; Vigneron-Tenorio, A. **2018**.
- 485 55. Yang, L.; Van der Werf, K. O.; Fitié, C. F.; Bennink, M. L.; Dijkstra, P. J.; Feijen, J. *Biophys.*  
486 *J.* **2008**, *94* (6), 2204–2211. doi:10.1529/biophysj.107.111013.
- 487 56. Wenger, M. P.; Bozec, L.; Horton, M. A.; Mesquida, P. *Biophys. J.* **2007**, *93* (4), 1255–1263.  
488 doi:10.1529/biophysj.106.103192.
- 489 57. Kuznetsova, T. G.; Starodubtseva, M. N.; Yegorenkov, N. I.; Chizhik, S. A.; Zhdanov, R. I.  
490 *Micron* **2007**, *38* (8), 824–833. doi:10.1016/j.micron.2007.06.011.

- 491 58. Johnson, K. L.; Kendall, K.; Roberts, A. *Proc. R. Soc. Lond. A* **1971**, *324* (1558), 301–313.  
492 doi:10.1098/rspa.1971.0141.
- 493 59. Maugis, D. *J. Colloid Interface Sci.* **1992**, *150* (1), 243–269. doi:10.1016/0021-9797(92)  
494 90285-T.
- 495 60. Derjaguin, B. V.; Muller, V. M.; Toporov, Y. P. *J. Colloid Interface Sci.* **1975**, *53* (2), 314–326.  
496 doi:10.1016/0021-9797(75)90018-1.
- 497 61. Svensson, R. B.; Mulder, H.; Kovanen, V.; Magnusson, S. P. *Biophys. J.* **2013**, *104* (11),  
498 2476–2484. doi:10.1016/j.bpj.2013.04.033.
- 499 62. Sachse, C.; Grigorieff, N.; Fändrich, M. *Angew. Chem.* **2010**, *49* (7), 1321–1323. doi:10.1002/  
500 anie.200904781.
- 501 63. Kis, A.; Kasas, S.; Babić, B.; Kulik, A.; Benoit, W.; Briggs, G.; Schönenberger, C.; Catsi-  
502 cas, S.; Forro, L. *Phys. Rev. Lett.* **2002**, *89* (24), 248101. doi:10.1103/PhysRevLett.89.248101.
- 503 64. Snyder, S. W.; Ladrör, U. S.; Wade, W. S.; Wang, G. T.; Barrett, L. W.; Matayoshi, E. D.;  
504 Huffaker, H. J.; Krafft, G. A.; Holzman, T. F. *Biophys. J.* **1994**, *67* (3), 1216–1228. doi:  
505 10.1016/S0006-3495(94)80591-0.
- 506 65. Mor, D. E.; Ugras, S. E.; Daniels, M. J.; Ischiropoulos, H. *Neurobiol. Dis.* **2016**, *88*, 66–74.  
507 doi:10.1016/j.nbd.2015.12.018.
- 508 66. Meersman, F.; Dobson, C. M. *Biochim. Biophys. Acta, Proteins Proteomics* **2006**, *1764* (3),  
509 452–460. doi:10.1016/j.bbapap.2005.10.021.

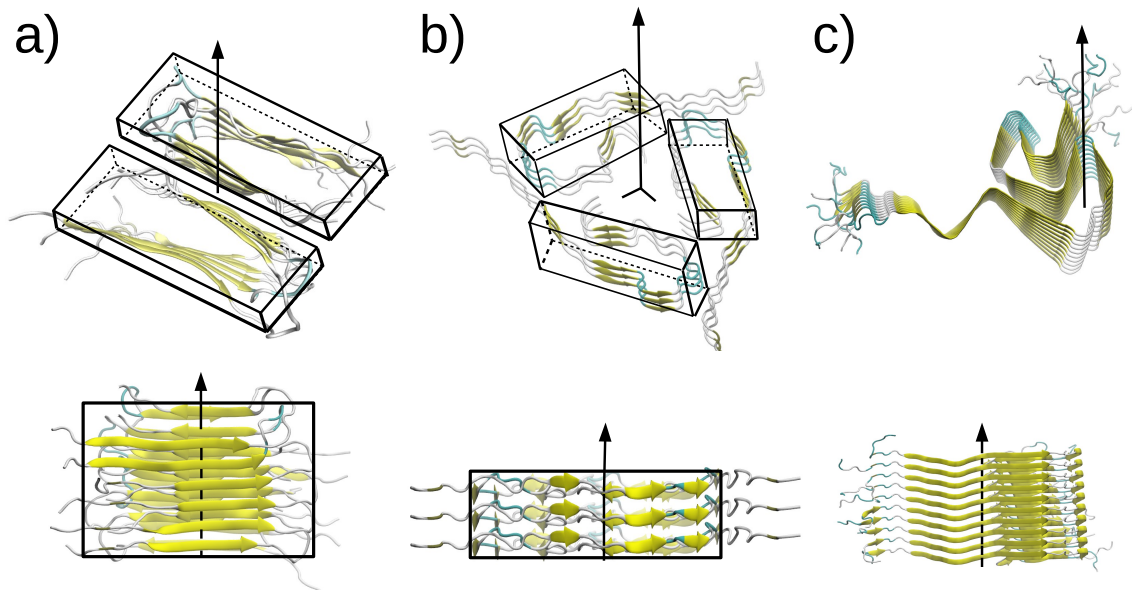

Figure 1: Snapshots illustrate a part of biological fibrils used in our simulation. The main axis of symmetry is indicated and the secondary structure for each chain. Panel (a) illustrates a  $\beta A_{40}$  (PDB id: 2LMO) with two-fold symmetry, while panel (b) a  $\beta A_{40}$  fibril (PDB id: 2M4J) with three-fold symmetry. Panel (c) illustrates the  $\alpha$ -syn fibril (PDB id: 2N0A) with no symmetry. Rectangular boxes depict the local symmetry.

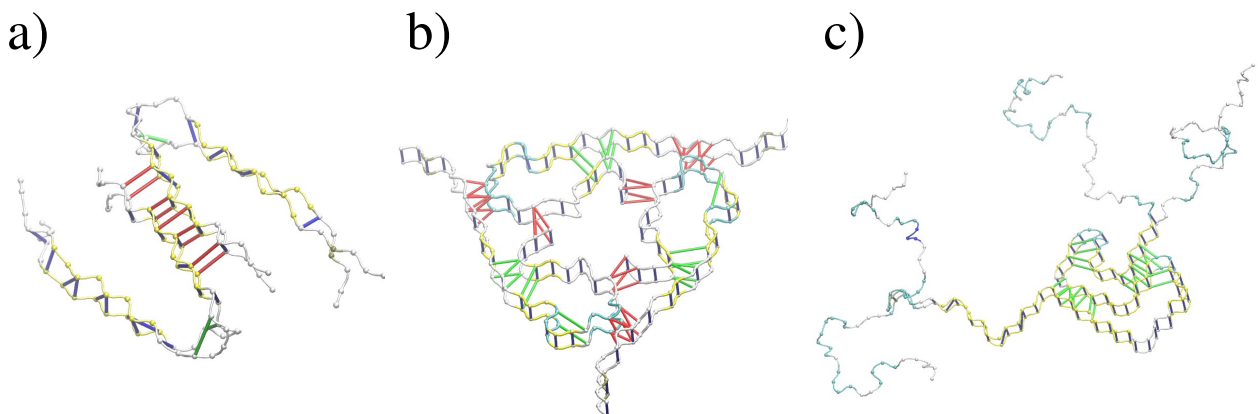

Figure 2: Coarse-grained representation of the biological fibrils presented in Fig.1. We illustrate the three types of ‘native contact’ interactions considered in our study: i) intrachain contacts (green), ii) interchain contacts (red) iii) intersheet contacts (blue).

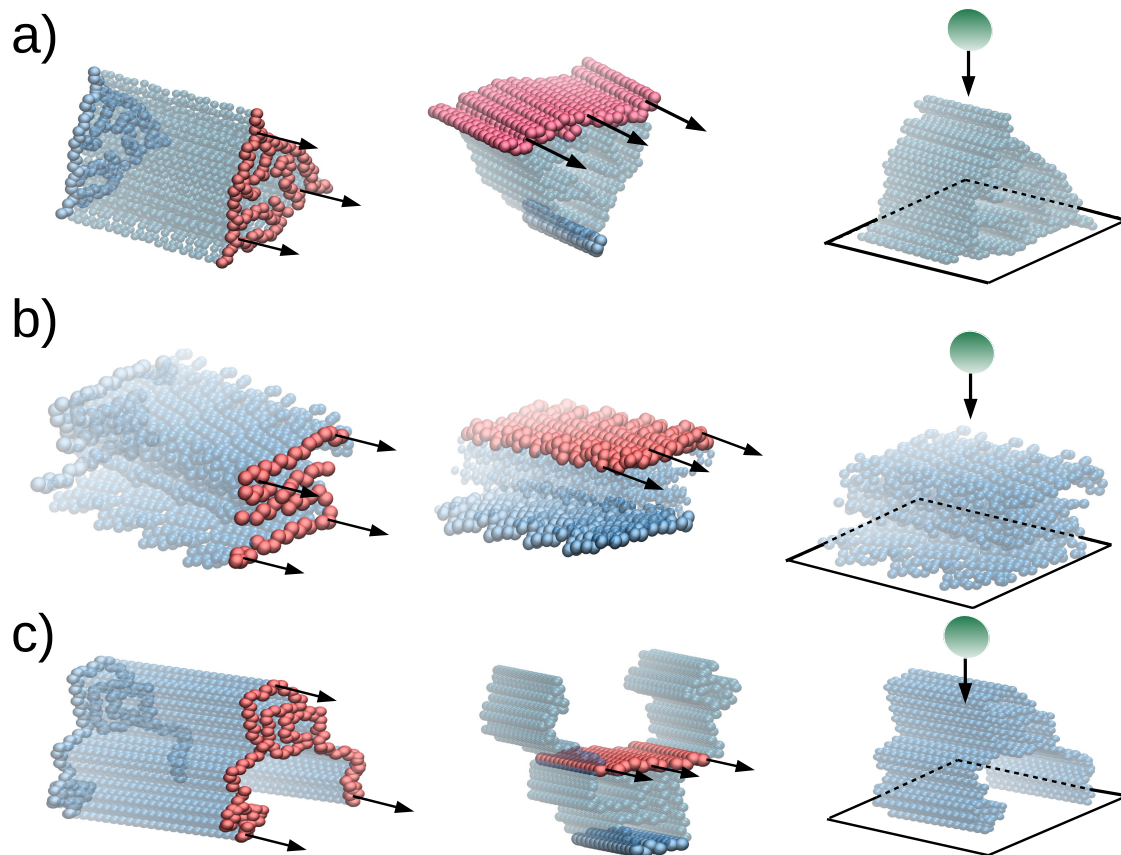

Figure 3: For the cases of Fig. 1, we present schematically each deformation process. Left side shows tensile, middle panel the shearing, and right panel the indentation processes. The set of  $C_{\alpha}$  atoms anchored in each processes are shown in solid blue colour, the ones which are moving at a speed  $v_{\text{pull}}$  are shown with red colour, and the indenter bead in green. Arrows indicate the direction of pulling. In the case of indentation, a potential  $z_0^{-10}$  has been used to model the basis plane, where  $z_0$  is the distance between the plane and the CG beads. Top panel shows the structure of  $\beta A_{40}$  (PDB id: 2M4J), middle panel for  $\beta A_{40}$  (PDB id: 2LMO) and bottom panel  $\alpha$ -syn (PDB id: 2NA0)



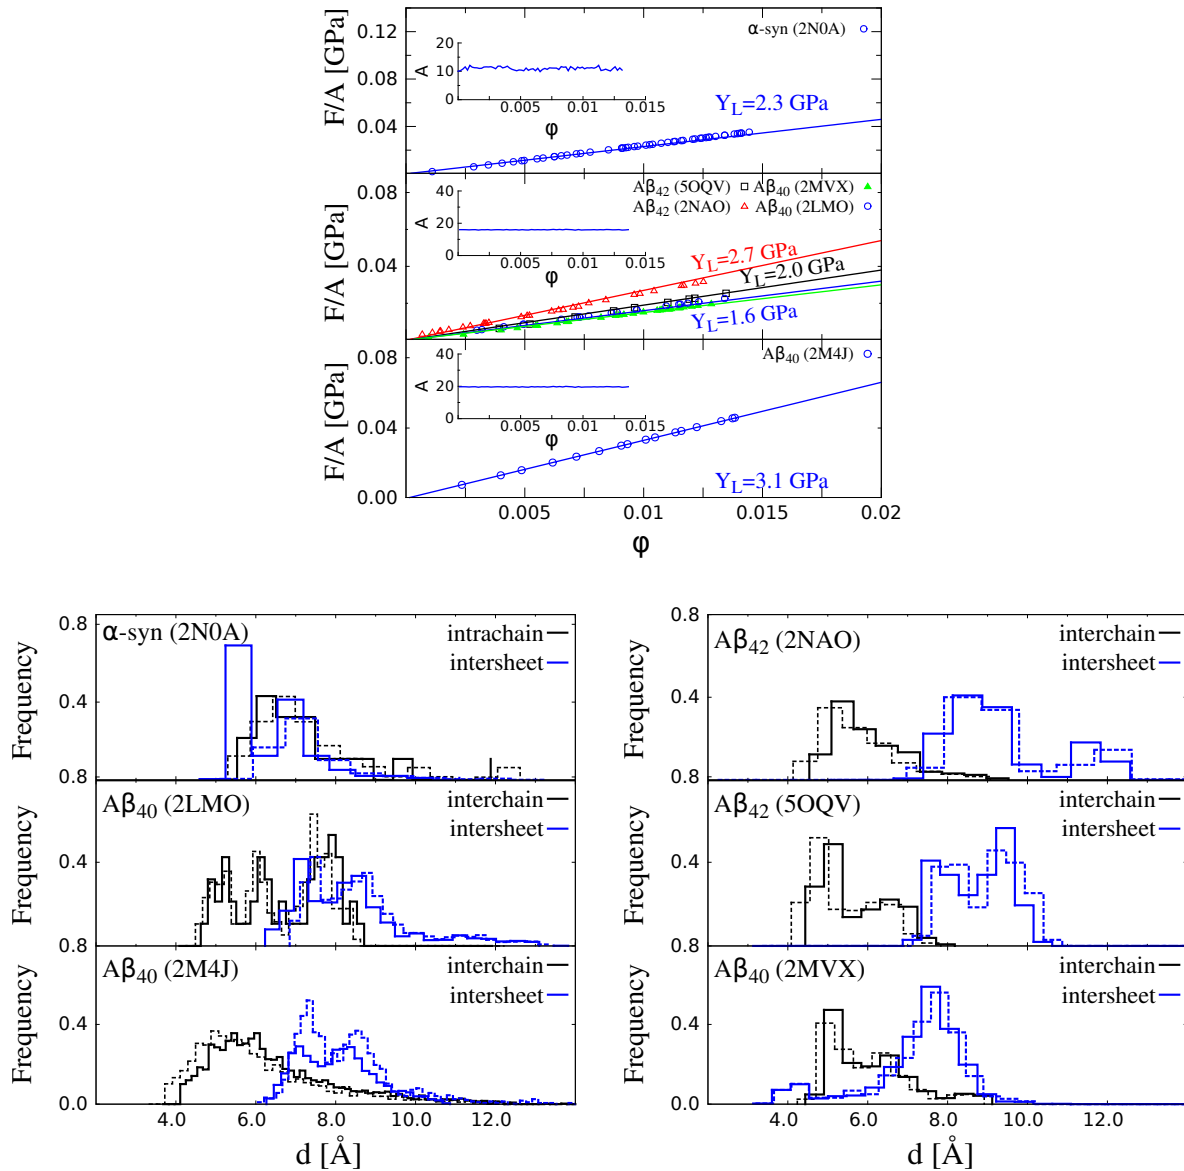

Figure 4: Results on tensile deformation. The top panel shows stress-strain curves of  $\alpha$ -synuclein, three  $AB_{40}$  and two  $AB_{42}$  fibrils. Circles correspond to  $\nu = 0.0005 \text{ \AA} / \tau$ . The error bars are the same as the symbol size and they are based on 50 independent simulations for each structure. The insets show the corresponding cross-section areas in nm<sup>2</sup> for the corresponding pulling speed. The lower panel shows the distributions of HB lengths for  $\phi = 0$  (solid lines) and for a finite strain  $\phi$  corresponding to the end of the linear regime (dashed lines): for  $\alpha$ -synuclein the final  $\phi = 0.014$ , while  $\phi = 0.012$  for  $AB$  amyloids.

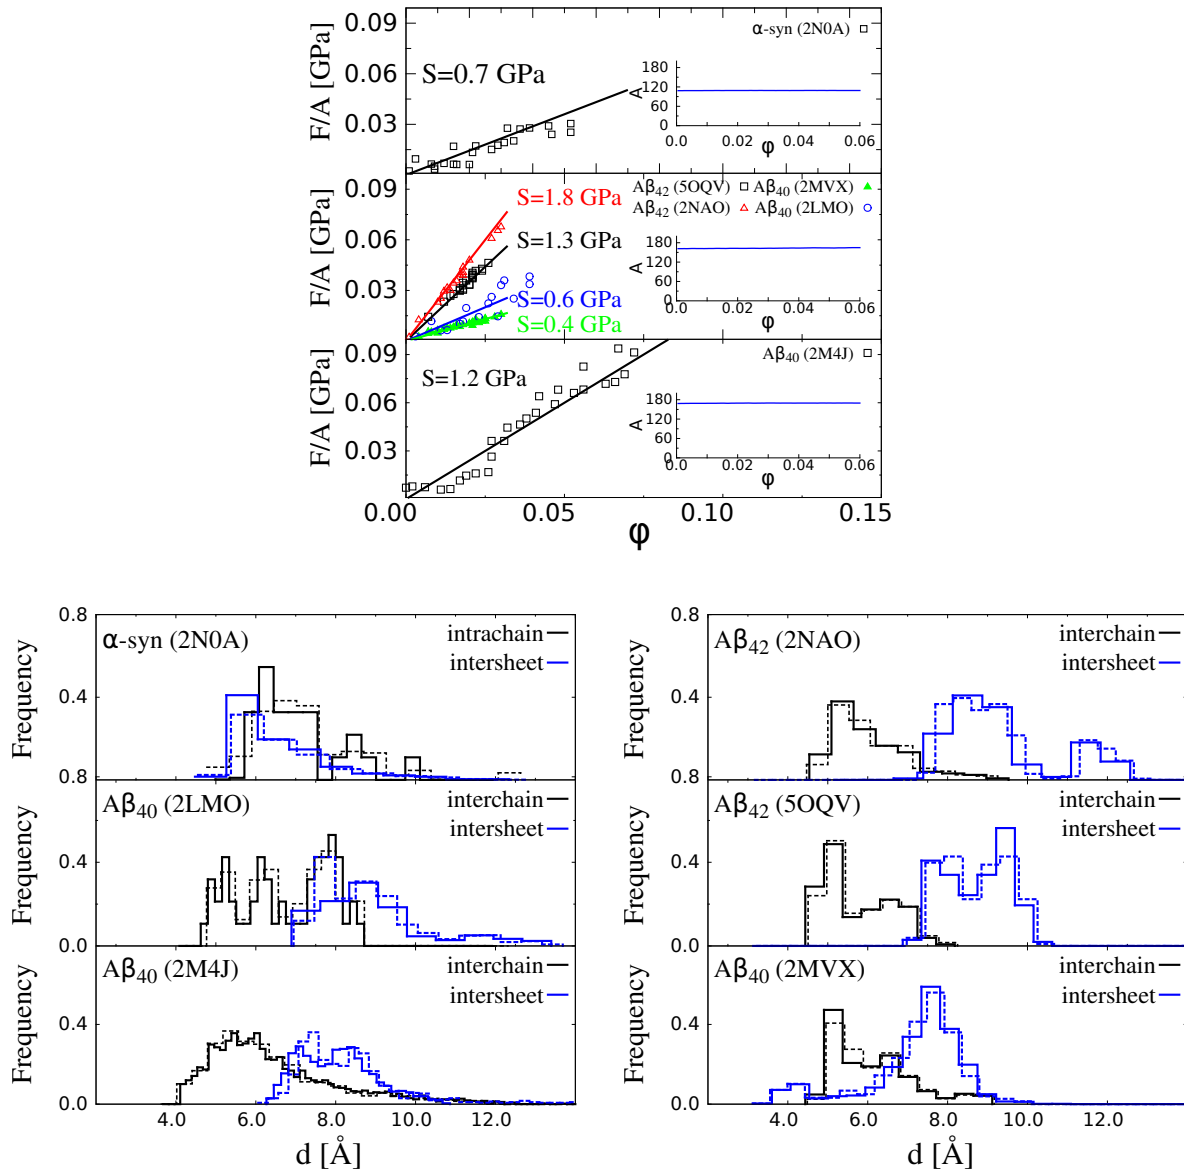

Figure 5: Results for shear deformation. The top panel shows stress–strain curves of  $\alpha$ -syn and three  $A\beta_{40}$  and two  $A\beta_{42}$  fibrils. Circles refer to  $\nu = 0.0005 \text{ \AA} / \tau$ . The error bars are the same as the symbol size and they are based on 50 independent simulations for each structure. The inset shows the corresponding cross-section area in  $\text{nm}^2$ . The lower panel presents the distributions of the HB lengths for  $\phi = 0$  (solid lines) and for a finite  $\phi$  corresponding to the end of the linear regime (dashed lines), which is 0.04 for  $\alpha$ -syn and 0.025 for  $A\beta$  amyloids. Only  $A\beta_{40}$  with PDB id: 2M4J has been calculated at strain  $\phi = 0.05$ .

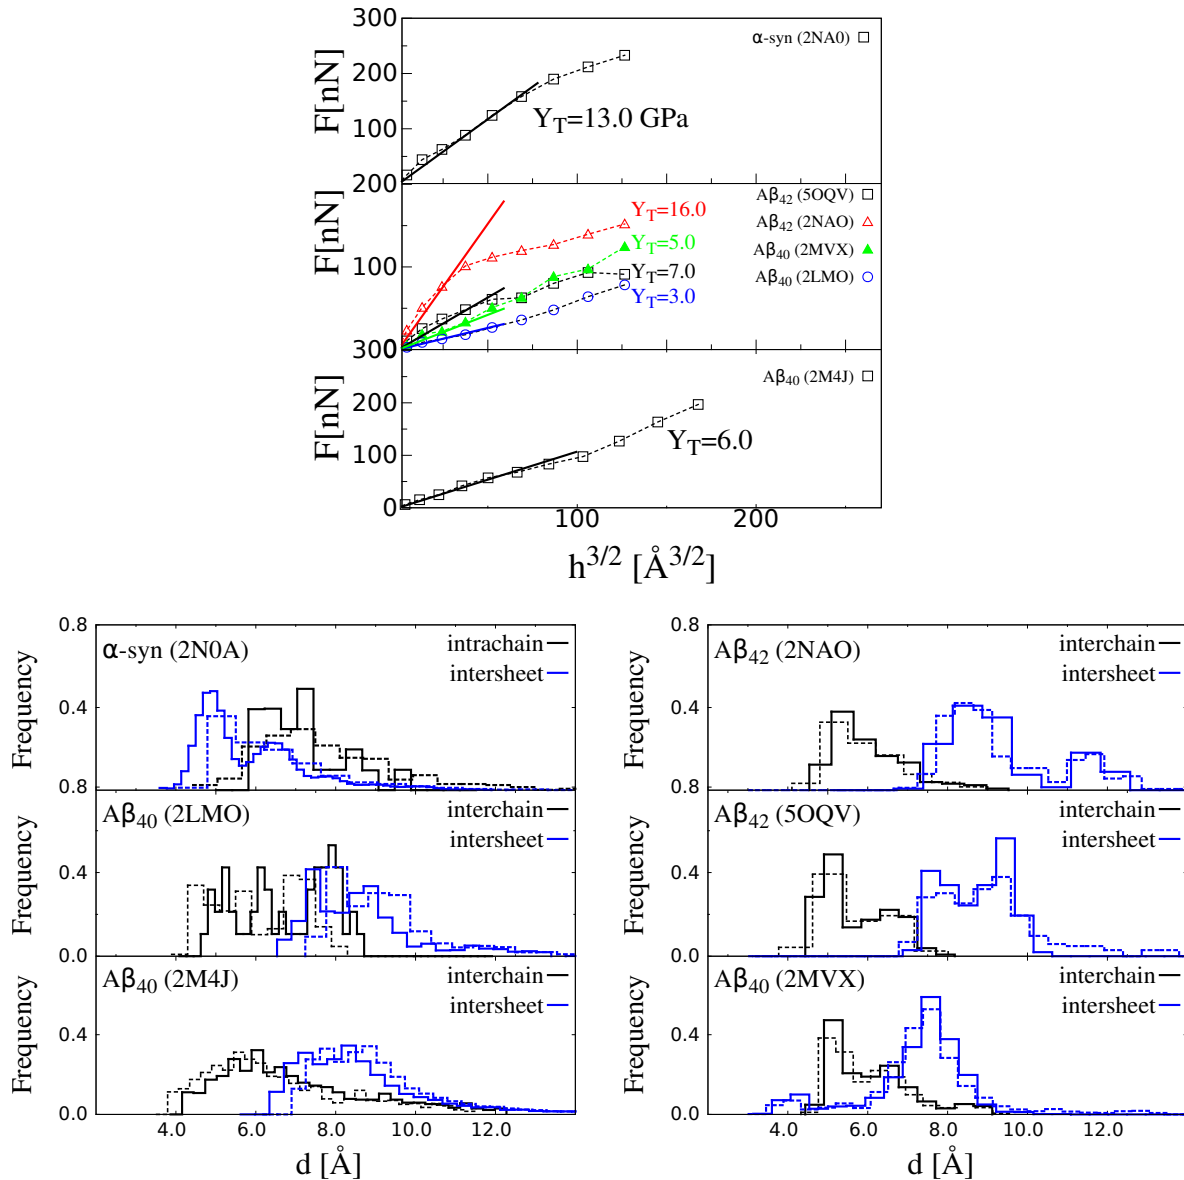

Figure 6: Nanoindentation deformation results for different biological fibrils. The top panel shows plots of force *versus* indentation depth ( $h$ ) for  $\alpha$ -syn, three  $A\beta_{40}$ , and two  $A\beta_{42}$  fibrils. Square symbols refer to  $v_{\text{ind}} = 0.005 \text{ \AA}/\tau$  and  $R_{\text{ind}} = 10$  nm. The error bars are the same as the symbol size and they are based on 50 independent simulations for each system. The distributions are calculated for  $h = 0$  (solid line) and  $h = 20$   $\text{\AA}$  in the case of  $\alpha$ -syn fibril and  $A\beta$  fibrils (dashed lines). Only in the case of  $A\beta_{42}$  with PDB id: 2NAO the value  $h = 9$   $\text{\AA}$  was considered.

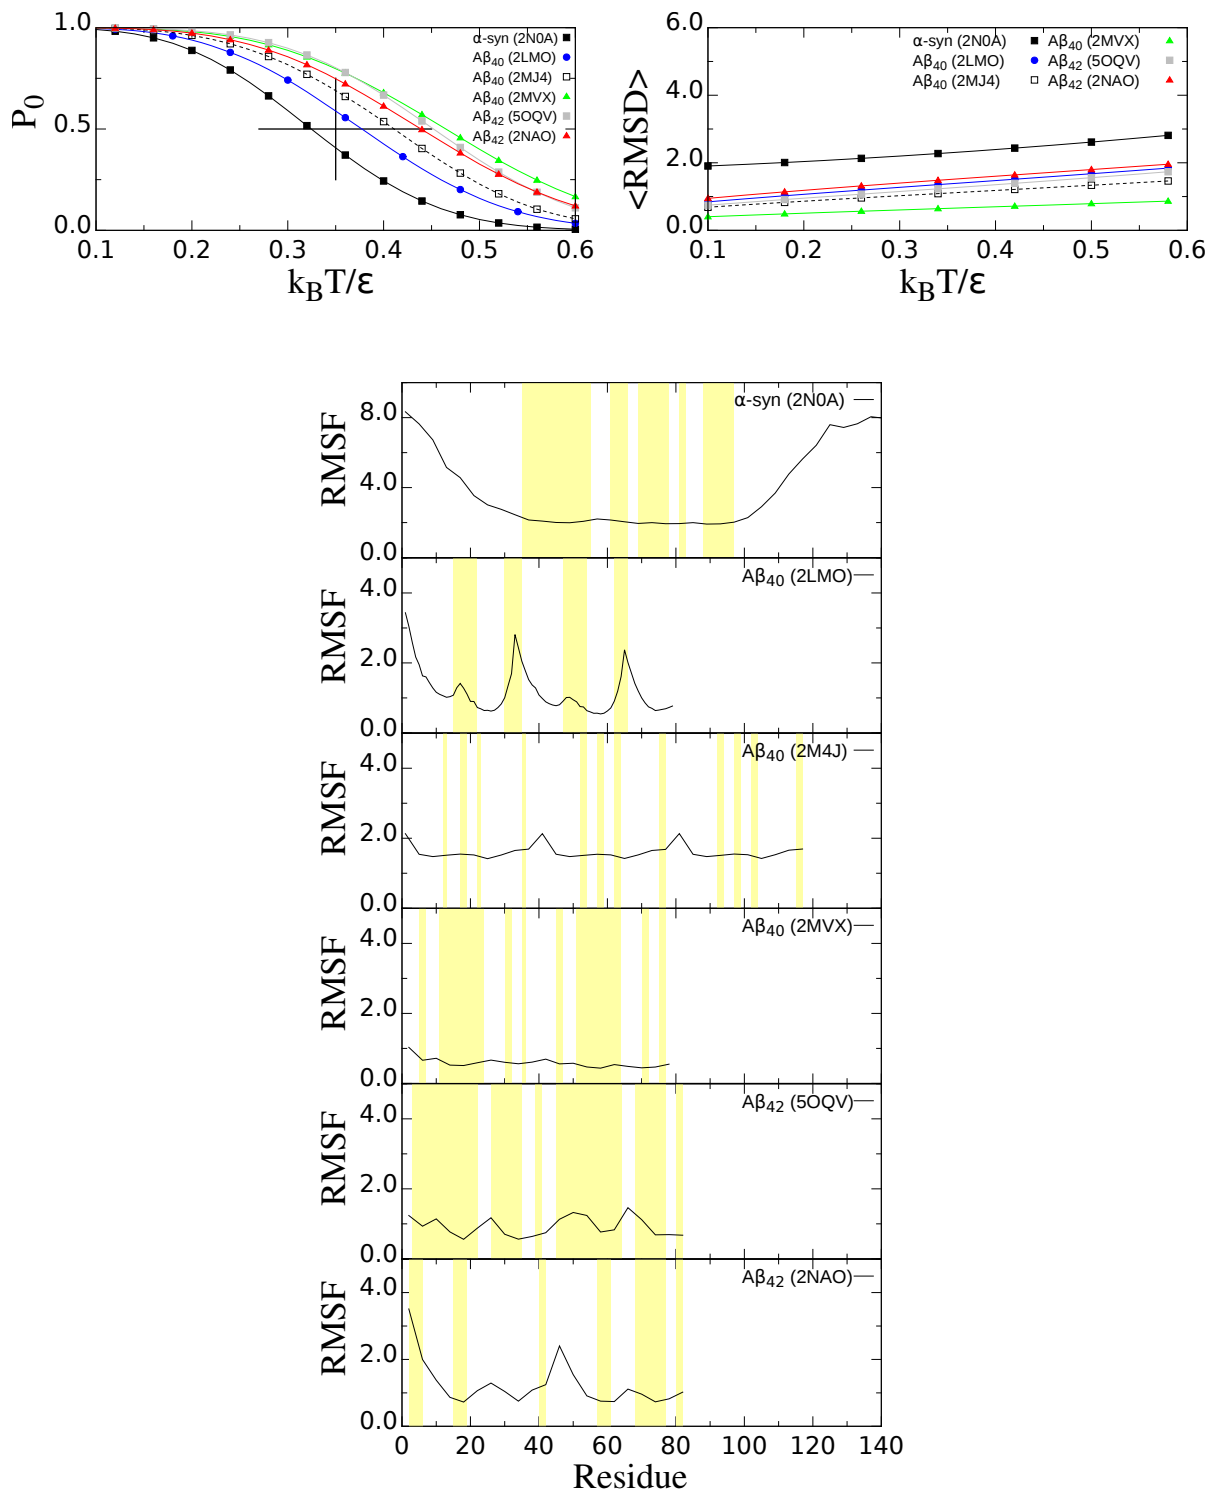

Figure 7: Thermodynamic properties of biological fibrils. Top (left) panel shows the probability of finding the fibrils in the native "ensemble" state,  $P_0$ , as a function of the temperature. The vertical line indicates the room temperature equal to  $0.35 \epsilon / k_B$  and the horizontal line the range of temperatures that offer thermodynamic stability in our model. Top (right) panel illustrates the RMSD of the fibrils. Bottom panel illustrates the root-mean-square-fluctuation (RMSF) at room temperature. The  $\beta$ -strand segments in each system are highlighted in yellow.
